# Supplementary material for: Ionic liquids modified graphene oxide composites: a high efficient adsorbent for phthalates from aqueous solution
Source: PubMed Central journal article supplement (PMC5133574; doi:10.1038/srep38417), 2016-12-02
Supplement: srep38417-s1.pdf [file srep38417-s1.pdf]

**Ionic liquids modified graphene oxide composites: a high efficient adsorbent for phthalates from aqueous solution**

Xinguang Zhou, Yinglu Zhang, Zuteng Huang, Dingkun Lu, Anwei Zhu, and Guoyue Shi\*

School of Chemistry and Molecular Engineering, East China Normal University, 500

Dongchuan Road, Shanghai 200241, P.R. China

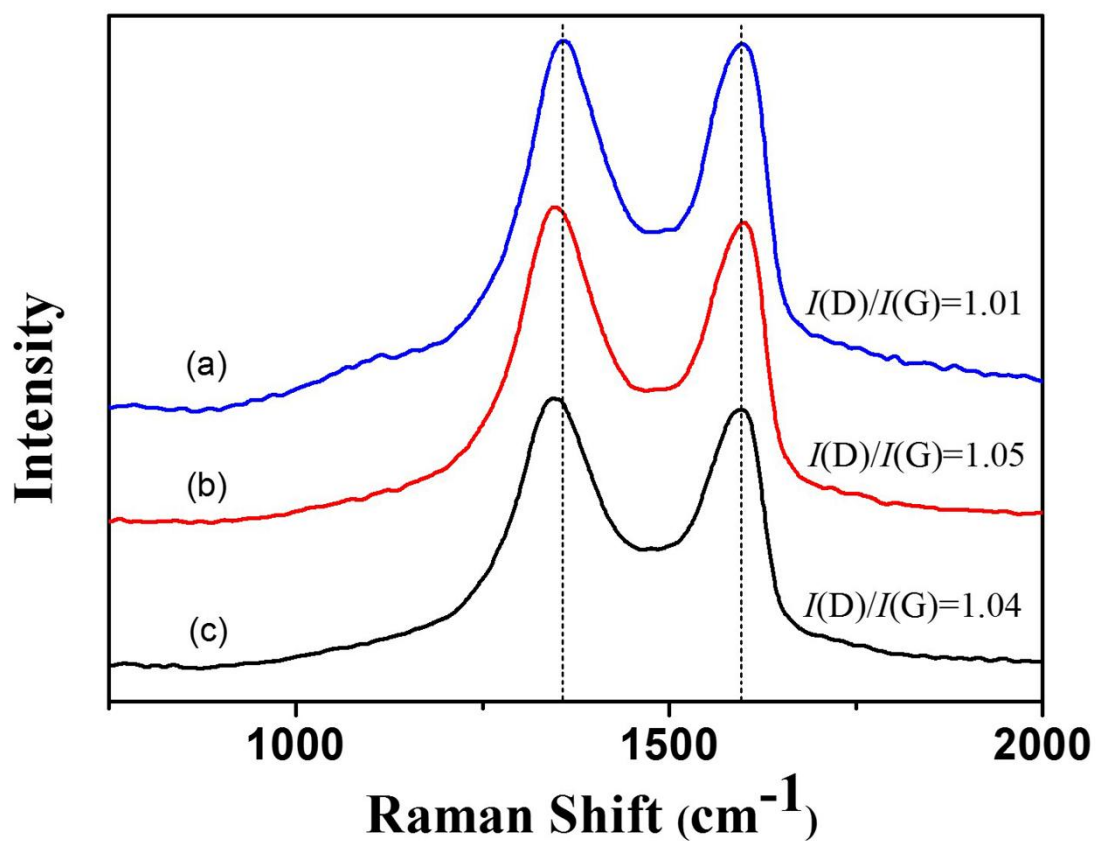

Figure S1. Raman spectra of (a) GO, (b) GO-[AEMIM][Br], and (c) GO-[APMIM][NTf<sub>2</sub>].

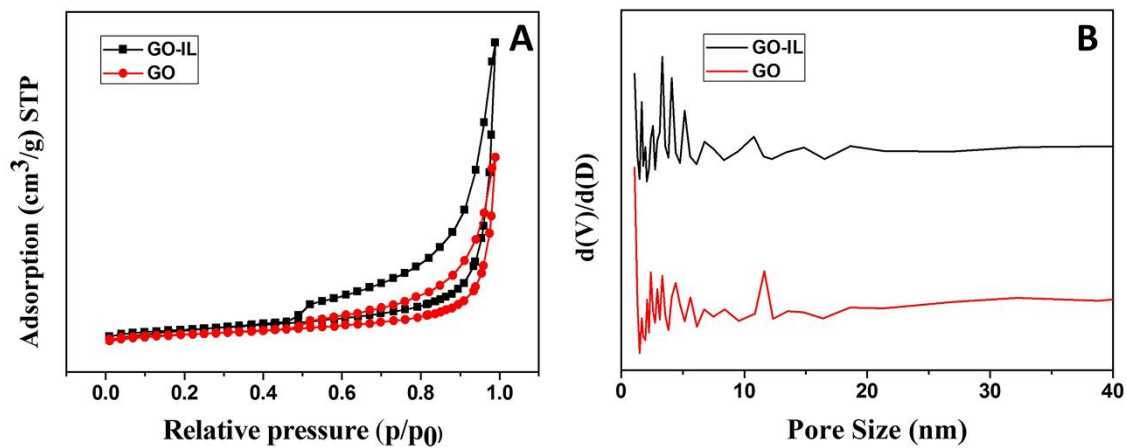

Figure S2. (A) N<sub>2</sub>-sorption isotherms of GO and GO-[AEMIM][Br] (B) the corresponding pore size distribution curves.

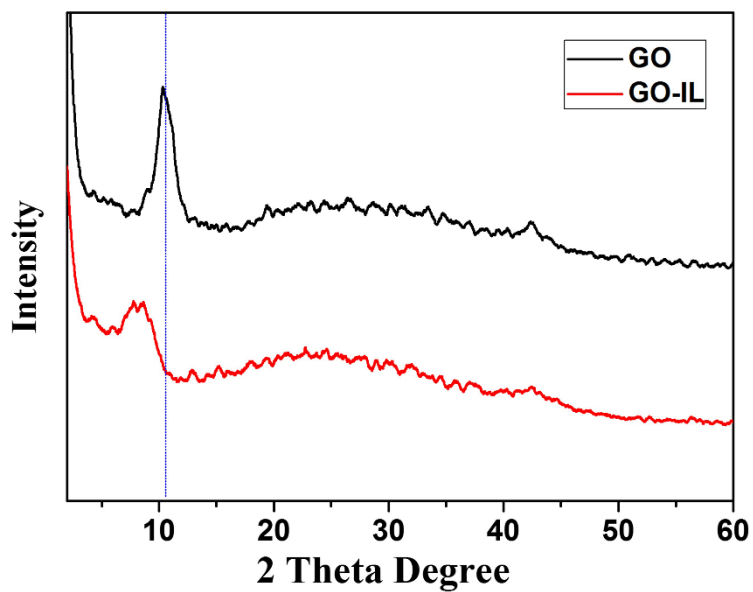

Figure S3. XRD patterns of the GO and GO-[AEMIM][Br].

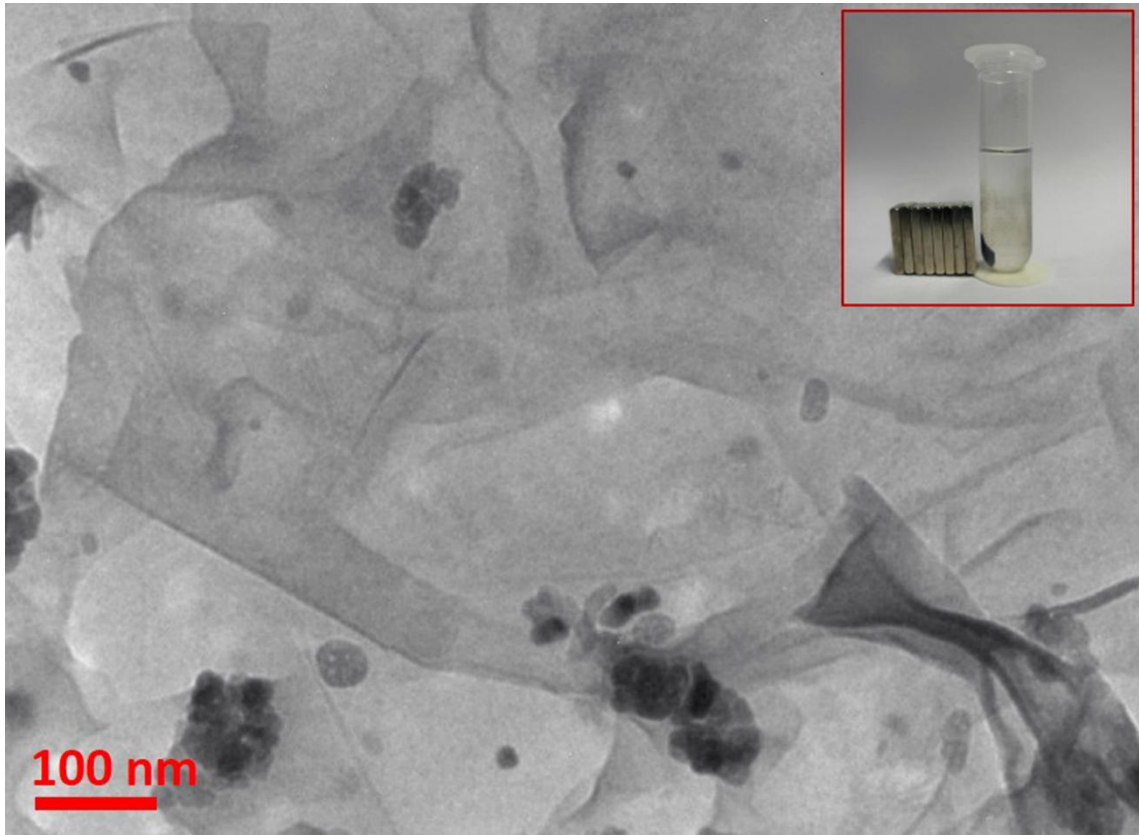

Figure S4. TEM image of MGO.

Table S1. The content of element C, O, N in GO and GO-ILs composites.

|                    | C (%) | O (%) | N (%) |
|--------------------|-------|-------|-------|
| GO                 | 70.75 | 28.56 | 0.68  |
| GO-[AEMIM][Br]     | 72.00 | 21.35 | 6.65  |
| GO-[APMIM][NTf(2)] | 72.24 | 21.26 | 5.10  |

Table S2. The adsorption capacities for nine PAEs by GO-[AEMIM][Br]

|      | 1 $\mu\text{g/mL}$<br>$\mu\text{g/g}$ | 2 $\mu\text{g/mL}$<br>$\mu\text{g/g}$ | 4 $\mu\text{g/mL}$<br>$\mu\text{g/g}$ | 6 $\mu\text{g/mL}$<br>$\mu\text{g/g}$ | 10 $\mu\text{g/mL}$<br>$\mu\text{g/g}$ |
|------|---------------------------------------|---------------------------------------|---------------------------------------|---------------------------------------|----------------------------------------|
| DMP  | 42.9                                  | 141.1                                 | 182.4                                 | 262.4                                 | 273.1                                  |
| DEP  | 45.5                                  | 124.2                                 | 160.8                                 | 267.0                                 | 336.1                                  |
| DPrP | 68.6                                  | 169.6                                 | 220.4                                 | 346.4                                 | 404.9                                  |
| BBP  | 92.0                                  | 180.0                                 | 317.6                                 | 470.1                                 | 459.7                                  |
| DIBP | 84.3                                  | 172.6                                 | 268.4                                 | 374.8                                 | 342.5                                  |
| DBP  | 84.6                                  | 162.8                                 | 254.2                                 | 385.3                                 | 368.9                                  |
| DNPP | 84.5                                  | 169.2                                 | 333.7                                 | 483.6                                 | 448.2                                  |
| DDP  | 68.2                                  | 137.0                                 | 266.1                                 | 207.9                                 | 101.5                                  |
| DNoP | 81.4                                  | 144.2                                 | 277.9                                 | 215.0                                 | 112.0                                  |
